# Supplementary material
Source: PubMed Central journal article supplement (PMC2755585)
Supplement: NIHMS103025-supplement-1.pdf [file NIHMS103025-supplement-1.pdf]

## Supplementary Information for

### Nicotine Binding to Brain Receptors Requires a Strong Cation- $\pi$ Interaction

Xinan Xiu, Nyssa L. Puskar, Jai A. P. Shanata, Henry A. Lester, and Dennis A. Dougherty\*

\*To whom correspondence should be addressed. E-mail: [dadougherty@caltech.edu](mailto:dadougherty@caltech.edu)

## Supplementary Figures

|                  | Loop A |   |   |   |   | Loop B |   |   |   |   | Loop C |   |   |   |   |   |   |   |   |   |   |   |   |   |   |   |   |
|------------------|--------|---|---|---|---|--------|---|---|---|---|--------|---|---|---|---|---|---|---|---|---|---|---|---|---|---|---|---|
| $\alpha$ 1 mouse | W      | R | P | D | V | V      | L | Y | W | T | Y      | D | G | S | V | V | Y | S | C | C | P | T | T | P | Y | L | D |
| $\alpha$ 1 human | W      | R | P | D | L | V      | L | Y | W | T | Y      | D | G | S | V | V | Y | S | C | C | P | D | T | P | Y | L | D |
| $\alpha$ 2 human | W      | I | P | D | I | V      | L | Y | W | T | Y      | D | K | A | K | I | Y | D | C | C | A | E | - | I | Y | P | D |
| $\alpha$ 4 human | W      | R | P | D | I | V      | L | Y | W | T | Y      | D | K | A | K | I | Y | E | C | C | A | E | - | I | Y | P | D |
| $\alpha$ 4 rat   | W      | R | P | D | I | V      | L | Y | W | T | Y      | D | K | A | K | I | Y | E | C | C | A | E | - | I | Y | P | D |
| $\alpha$ 3 human | W      | K | P | D | I | V      | L | Y | W | S | Y      | D | K | A | K | I | Y | N | C | C | E | E | - | I | Y | P | D |
| $\alpha$ 6 human | W      | K | P | D | I | V      | L | Y | W | T | Y      | D | K | A | E | I | Y | N | C | C | E | E | - | I | Y | T | D |
| $\alpha$ 7 human | W      | K | P | D | I | L      | L | Y | W | S | Y      | G | G | W | S | L | Y | E | C | C | K | E | - | P | Y | P | D |
| $\alpha$ 7 rat   | W      | K | P | D | I | L      | L | Y | W | S | Y      | G | G | W | S | L | Y | E | C | C | K | E | - | P | Y | P | D |
| $\alpha$ 9 human | W      | R | P | D | I | V      | L | Y | W | T | Y      | N | G | N | Q | V | Y | G | C | C | S | E | - | P | Y | P | D |

  

|                  | Loop D |   |   |   |   |   |
|------------------|--------|---|---|---|---|---|
| $\gamma$ mouse   | W      | I | E | M | Q | W |
| $\gamma$ human   | W      | I | E | M | Q | W |
| $\delta$ mouse   | W      | I | D | H | A | W |
| $\delta$ human   | W      | I | E | H | G | W |
| $\beta$ 2 human  | W      | L | T | Q | E | W |
| $\beta$ 2 rat    | W      | L | T | Q | E | W |
| $\beta$ 3 human  | W      | L | K | Q | E | W |
| $\beta$ 4 human  | W      | L | K | Q | E | W |
| $\alpha$ 7 human | W      | L | Q | M | S | W |
| $\alpha$ 7 rat   | W      | L | Q | M | S | W |
| $\alpha$ 9 human | W      | I | R | Q | I | W |

**Supplementary Figure 1.** Sequence alignment for Loops A, B, C, and D in the vicinity of the aromatic binding box. The five residues of the aromatic box: TyrA, TrpB, TryC1, TyrC2, and TrpD are highlighted in green. They are universally conserved in these subunits. G135 ( $\alpha$ 1) is the fourth residue after TrpB, highlighted in blue.

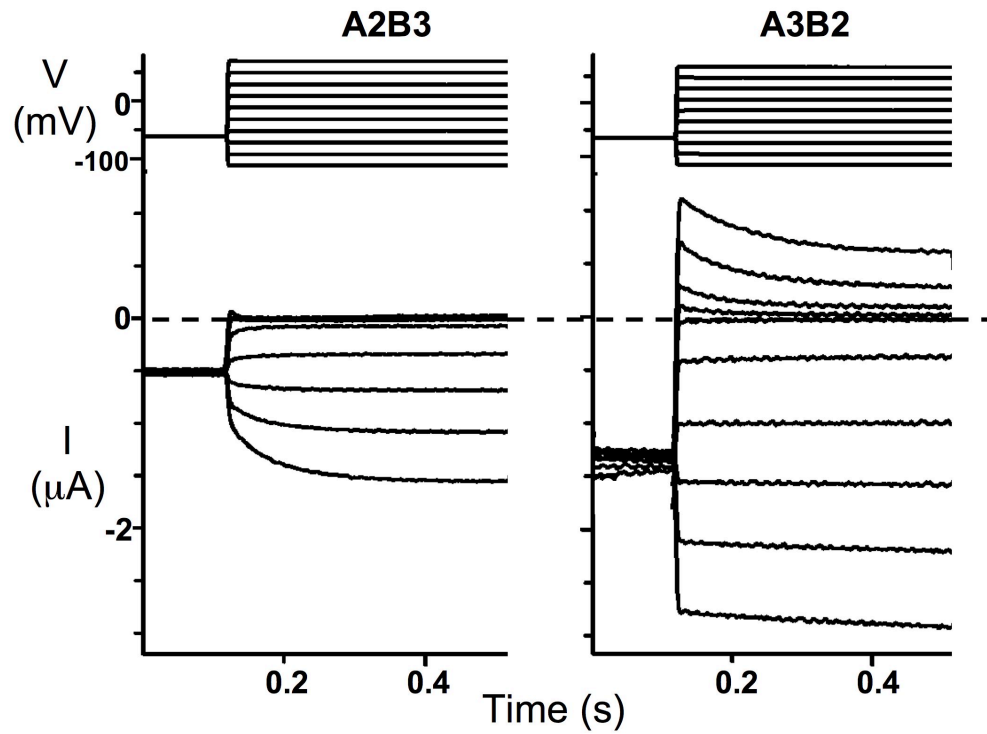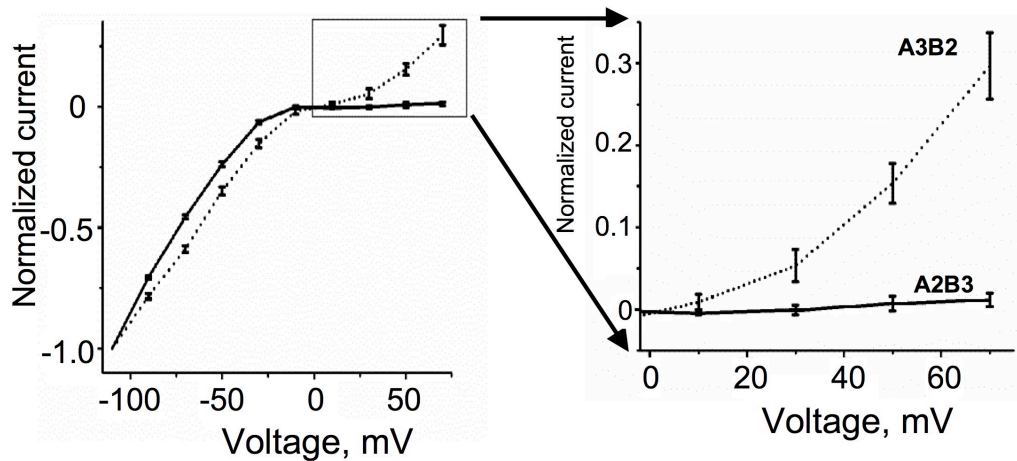

**Supplementary Figure 2.** Rectification behaviors of A2B3 and A3B2 L9'A  $\alpha 4\beta 2$  nAChR. Upper: Representative voltage traces and current responses for voltage jump experiments. Lower: I-V curves for A2B3 (solid line) and A3B2 (dotted line). The inset shows positive voltages, where A2B3 and A3B2 exhibit markedly different behavior.

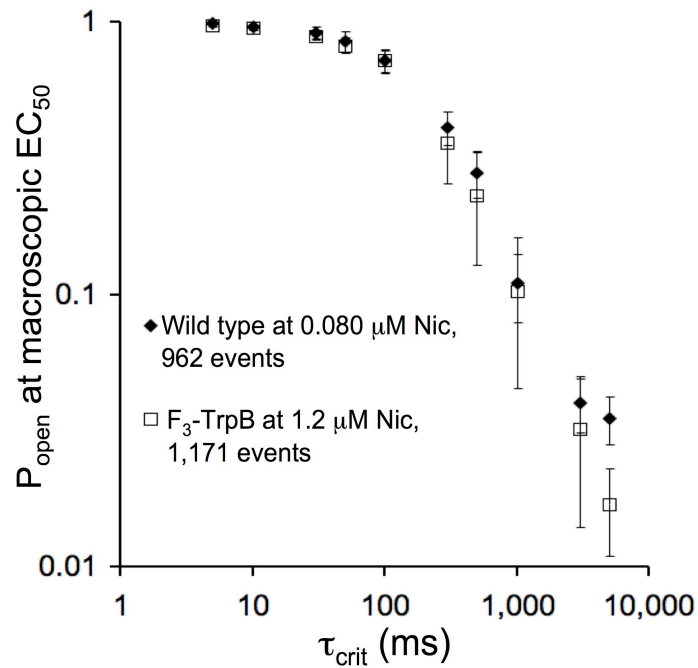

**Supplementary Figure 3.** Comparison of  $P_{open}$  at macroscopic  $EC_{50}$  for wild type and F<sub>3</sub>-TrpB  $\alpha 4\beta 2$  (A2B3) over a range of  $\tau_{crit}$  values between 5 ms and 5000 ms reveals essentially equivalent gating behaviors. Error bars are mean  $\pm$  s.e.m. and are smaller than the symbol when not shown.

| <b><math>\alpha 4(L9'A)\beta 2</math></b> |               |                      |                 |                      |                        |  |
|-------------------------------------------|---------------|----------------------|-----------------|----------------------|------------------------|--|
| <b>Mutation</b>                           | <b>ACh</b>    | <b>n<sub>H</sub></b> | <b>Nicotine</b> | <b>n<sub>H</sub></b> | <b>Norm. I (+70mV)</b> |  |
| <b>Wild type</b>                          |               |                      |                 |                      |                        |  |
| <b>A2B3</b>                               | 0.42 ± 0.01   | 1.2 ± 0.1            | 0.08 ± 0.01     | 1.2 ± 0.1            | 0.041 ± 0.005          |  |
| <b>A3B2</b>                               | 0.023 ± 0.001 | 1.3 ± 0.1            | 0.01 ± 0.001    | 1.7 ± 0.2            | 0.297 ± 0.041          |  |
| <b>TyrA (Tyr98) A2B3</b>                  |               |                      |                 |                      |                        |  |
| <b>Tyr</b>                                | 0.42 ± 0.03   | 1.2 ± 0.1            | 0.08 ± 0.01     | 1.7 ± 0.3            | 0.023 ± 0.009          |  |
| <b>Phe</b>                                | 12 ± 1        | 1.3 ± 0.1            | 0.77 ± 0.05     | 2.1 ± 0.3            | 0.064 ± 0.011          |  |
| <b>MeO-Phe</b>                            | 2.3 ± 0.2     | 1.2 ± 0.1            | 0.40 ± 0.02     | 1.7 ± 0.2            | 0.054 ± 0.032          |  |
| <b>F-Phe</b>                              | 15 ± 1        | 1.2 ± 0.1            | 0.32 ± 0.03     | 1.4 ± 0.2            | -0.076 ± 0.046         |  |
| <b>F<sub>2</sub>-Phe</b>                  | 16 ± 2        | 1.8 ± 0.3            | 0.39 ± 0.05     | 1.8 ± 0.4            | 0.028 ± 0.005          |  |
| <b>F<sub>3</sub>-Phe</b>                  | 14 ± 1        | 1.2 ± 0.1            | 0.53 ± 0.04     | 1.4 ± 0.1            | 0.044 ± 0.010          |  |
| <b>Br-Phe</b>                             | 3.3 ± 0.2     | 1.2 ± 0.1            | 0.54 ± 0.04     | 1.5 ± 0.1            | -0.003 ± 0.031         |  |
| <b>CN-Phe</b>                             | 73 ± 4        | 1.7 ± 0.1            | 8.8 ± 0.9       | 1.5 ± 0.2            | 0.075 ± 0.008          |  |
| <b>TrpB (Trp 154) A2B3</b>                |               |                      |                 |                      |                        |  |
| <b>Trp</b>                                | 0.44 ± 0.03   | 1.3 ± 0.1            | 0.09 ± 0.01     | 1.5 ± 0.1            | 0.006 ± 0.014          |  |
| <b>F-Trp</b>                              | 1.9 ± 0.1     | 1.2 ± 0.1            | 0.26 ± 0.02     | 1.3 ± 0.1            | -0.065 ± 0.047         |  |
| <b>F<sub>2</sub>-Trp</b>                  | 2.0 ± 0.1     | 1.3 ± 0.1            | 0.32 ± 0.04     | 1.3 ± 0.1            | 0.032 ± 0.025          |  |
| <b>F<sub>3</sub>-Trp</b>                  | 13 ± 1        | 1.3 ± 0.1            | 1.2 ± 0.1       | 1.4 ± 0.2            | -0.073 ± 0.029         |  |
| <b>F<sub>4</sub>-Trp</b>                  | 29 ± 2        | 1.1 ± 0.1            | 4.2 ± 0.4       | 1.3 ± 0.2            | -0.027 ± 0.023         |  |
| <b>CN-Trp</b>                             | 12 ± 1        | 1.2 ± 0.1            | 0.90 ± 0.07     | 1.4 ± 0.1            | 0.009 ± 0.017          |  |
| <b>Br-Trp</b>                             | 1.1 ± 0.1     | 1.3 ± 0.1            | 0.20 ± 0.02     | 1.3 ± 0.2            | 0.020 ± 0.005          |  |
| <b>TyrC1 (Tyr195) A2B3</b>                |               |                      |                 |                      |                        |  |
| <b>Tyr</b>                                | 0.42 ± 0.03   | 1.5 ± 0.1            | 0.07 ± 0.01     | 1.3 ± 0.1            | 0.042 ± 0.014          |  |
| <b>Phe</b>                                | 53 ± 4        | 1.3 ± 0.1            | 3.3 ± 0.2       | 1.2 ± 0.1            | 0.059 ± 0.014          |  |
| <b>MeO-Phe</b>                            | 48 ± 5        | 1.4 ± 0.2            | 2.8 ± 0.4       | 1.2 ± 0.2            | 0.064 ± 0.028          |  |
| <b>CN-Phe</b>                             | 210 ± 10      | 1.6 ± 0.1            | 19 ± 2          | 1.6 ± 0.2            | 0.057 ± 0.011          |  |
| <b>TyrC2 (Tyr202) A2B3</b>                |               |                      |                 |                      |                        |  |
| <b>Tyr</b>                                | 0.42 ± 0.03   | 1.3 ± 0.1            | 0.09 ± 0.01     | 1.6 ± 0.1            | 0.057 ± 0.016          |  |
| <b>Phe</b>                                | 0.32 ± 0.02   | 1.4 ± 0.1            | 0.14 ± 0.01     | 1.4 ± 0.1            | 0.014 ± 0.010          |  |
| <b>MeO-Phe</b>                            | 0.33 ± 0.02   | 1.3 ± 0.1            | 0.097 ± 0.006   | 1.7 ± 0.2            | 0.034 ± 0.033          |  |
| <b>CN-Phe</b>                             | 0.42 ± 0.04   | 1.4 ± 0.2            | 0.11 ± 0.01     | 1.6 ± 0.2            | 0.066 ± 0.046          |  |
| <b>Thr (B+1) (Thr 155) A2B3</b>           |               |                      |                 |                      |                        |  |
| <b>Thr</b>                                | 0.41 ± 0.02   | 1.4 ± 0.1            | 0.09 ± 0.01     | 1.6 ± 0.1            | 0.044 ± 0.007          |  |
| <b>Tah</b>                                | 0.37 ± 0.02   | 1.3 ± 0.1            | 1.71 ± 0.14     | 1.2 ± 0.1            | 0.018 ± 0.013          |  |
| <b>Muscle-type Receptor<sup>a</sup></b>   |               |                      |                 |                      |                        |  |
| <b>Thr (B+1) (Thr150)<sup>b</sup></b>     |               |                      |                 |                      |                        |  |
| <b>Thr</b>                                | 0.83 ± 0.04   | 1.8 ± 0.1            | 57 ± 2          | 2.1 ± 0.1            | ND                     |  |
| <b>Tah</b>                                | 0.25 ± 0.01   | 1.4 ± 0.1            | 92 ± 4          | 1.7 ± 0.1            | ND                     |  |

| <b><math>\alpha 1(\text{G153K})</math></b> |       |   |       |     |   |     |      |   |      |     |   |     |    |
|--------------------------------------------|-------|---|-------|-----|---|-----|------|---|------|-----|---|-----|----|
| <b>Trp</b>                                 | 0.019 | ± | 0.001 | 1.5 | ± | 0.1 | 0.59 | ± | 0.04 | 1.8 | ± | 0.2 | ND |
| <b>F-Trp</b>                               | 0.094 | ± | 0.004 | 1.6 | ± | 0.1 | 2.8  | ± | 0.1  | 1.3 | ± | 0.1 | ND |
| <b>F<sub>2</sub>-Trp</b>                   | 0.079 | ± | 0.004 | 1.3 | ± | 0.1 | 2.3  | ± | 0.1  | 1.3 | ± | 0.1 | ND |
| <b>F<sub>3</sub>-Trp</b>                   | 1.05  | ± | 0.03  | 1.3 | ± | 0.1 | 11   | ± | 1    | 1.5 | ± | 0.1 | ND |
| <b>F<sub>4</sub>-Trp</b>                   | 7.5   | ± | 0.5   | 1.2 | ± | 0.1 | 32   | ± | 4    | 1.5 | ± | 0.2 | ND |
| <b>CN-Trp</b>                              | 2.4   | ± | 0.1   | 1.5 | ± | 0.1 | 36   | ± | 3    | 1.7 | ± | 0.2 | ND |
| <b>Br-Trp</b>                              | 0.047 | ± | 0.001 | 1.4 | ± | 0.1 | 4.45 | ± | 0.42 | 1.2 | ± | 0.1 | ND |

**Supplementary Table 1.** EC<sub>50</sub> values ( $\mu\text{M}$ ), Hill coefficients ( $n_H$ ) and current size at +70 mV (normalized to current size at -110 mV). ND = not determined. a. All studies of the muscle-type receptor contain a L9'S mutation in the  $\beta$  subunit. b. These values were previously reported<sup>25</sup>.

## Supplementary Discussion

### **Controlling the Stoichiometry of $\alpha 4\beta 2$ Receptors**

As in the case of previous studies, we find that the stoichiometry of  $\alpha 4\beta 2$  receptors can be controlled by altering the ratio of the subunits of mRNA during injection. Our criteria for defining a pure population of A2B3  $\alpha 4(L9'A)\beta 2$  receptors are whole-cell dose-response curves that fit a single component and very strong inward rectification such that  $(I_{\max}$  at +70 mV)/(I<sub>max</sub> at -110 mV) < 0.1. An alternative analysis which can also demonstrate a mixed population of receptors is the production of intermediate EC<sub>50</sub> values when fit to a single component. As shown below, by a 3:1  $\alpha 4:\beta 2$  mRNA ratio, the EC<sub>50</sub> value has reached the higher EC<sub>50</sub> value, which is the A2B3 stoichiometry.

| <b><math>\alpha 4:\beta 2</math> ratio</b> | <b>EC<sub>50</sub> (<math>\mu</math>M ACh)</b> |
|--------------------------------------------|------------------------------------------------|
| 100:1                                      | 0.023 $\pm$ 0.002                              |
| 10:1                                       | 0.023 $\pm$ 0.001                              |
| 6:1                                        | 0.15 $\pm$ 0.02                                |
| 3:1                                        | 0.44 $\pm$ 0.03                                |
| 1:1                                        | 0.40 $\pm$ 0.01                                |
| 1:10                                       | 0.43 $\pm$ 0.02                                |

Injection of an mRNA ratio  $\alpha 4(L9'A):\beta 2$  of 10:1 or higher produces pure populations of A3B2, while a ratio of 1:3 or lower guarantees a pure population of A2B3. In the experiments described here, we injected a 1:3 ratio of mRNA.

Note that the  $\alpha 4(L9'A)$  mutation lowers EC<sub>50</sub> in a multiplicative fashion, depending on how many  $\alpha 4$  subunits are present. As such, our A3B2 receptor (with three L9'A mutations) actually has a lower EC<sub>50</sub> than our A2B3 receptor (with two L9'A mutations), even though the binding site from the A2B3 stoichiometry is clearly that of the high sensitivity receptor.

### **TyrA, TyrC1, and TyrC2 Display Similar Interactions in Muscle-type and $\alpha 4\beta 2$**

In addition to TrpB, we have performed extensive studies of other aromatic residues in and around the aromatic box (Supplementary Table 1). Briefly, when comparing  $\alpha 4\beta 2$  to the muscle-type receptor, very similar results are seen. TyrC1 is very sensitive to substitution, establishing a key role for this residue, likely in receptor gating. TyrA appears to be a hydrogen

bond donor (large effects for Phe and MeO-Phe substitutions), and while it is generally more sensitive to perturbations in the neuronal receptor, the basic trends are the same. TyrC2 is very permissive in both the muscle-type and  $\alpha 4\beta 2$  receptors.

### **Single-Channel Recording and Analysis**

Here we have used single-channel measurements to convincingly establish that the fluorination approach is changing agonist binding, not channel gating. Macroscopic data establish the large successive shift in function ( $EC_{50}$ ) upon fluorination, and single-channel data establish that gating is unperturbed, since the probability that the channel is open,  $P_{open}$ , is essentially indistinguishable for wild type and  $F_3$ -TrpB at corresponding points on the dose-response relation. At saturating agonist concentrations,  $P_{open,max}$  approaches  $\Theta/(\Theta+1)$ . Our analysis starts by comparing the  $P_{open}$  values at the macroscopic  $EC_{50}$ . The  $P_{open}$  values that we report are directly related to the gating equilibrium constant,  $\Theta$ , by  $\frac{1}{2} * \Theta/(\Theta+1)$ .

#### *Definition of clusters and calculation of $P_{open}$*

Because (a) single-channel channel measurements of  $P_{open}$  are seldom reported for  $\alpha 4\beta 2$  receptors, and (b) we find that  $P_{open}$  depends strongly on the value chosen as the critical closed duration,  $\tau_{crit}$ , we report  $P_{open}$  values for the range  $5 \text{ ms} \leq \tau_{crit} \leq 5000 \text{ ms}$  using two different methods to identify  $\tau_{crit}$  (below and Supplementary Fig. 3, above). The first is the commonly used method: the longest one or more components of the closed dwell time histogram are considered as sojourns in the desensitized state for all of the channels in the patch<sup>32</sup>. The value for  $\tau_{crit}$  was defined based on the closed dwell time histograms fitted with multiple components, as previously described<sup>33</sup>. These components are similar for wild type and  $F_3$ -TrpB, resulting in similar  $\tau_{crit}$  values:  $\tau_{crit1}$  of 1470 vs 1530 ms and  $\tau_{crit2}$  of 42 vs 52 ms, respectively. The similarity of the closed dwell time histograms for these receptors (and the resultant  $\tau_{crit}$  values) can be taken as evidence that fluorination does not significantly impact desensitization. Moreover, whole-cell data show that the wild type and the  $F_3$ -TrpB receptors exhibit similar extent and kinetics of macroscopic desensitization (data not shown). When either of the  $\tau_{crit}$  values calculated from the closed dwell time histogram is applied,  $P_{open}$  is essentially indistinguishable

for wild type and F<sub>3</sub>-TrpB. The P<sub>open</sub> values for wild type and F<sub>3</sub>-TrpB at τ<sub>crit1</sub> and τ<sub>crit2</sub> are given here ± s.e.m.

| <b>Receptor</b>      | <b>P<sub>open</sub> (τ<sub>crit1</sub>)</b> | <b>P<sub>open</sub> (τ<sub>crit2</sub>)</b> |
|----------------------|---------------------------------------------|---------------------------------------------|
| Wild type            | 0.07 ± 0.02                                 | 0.88 ± 0.06                                 |
| F <sub>3</sub> -TrpB | 0.06 ± 0.03                                 | 0.82 ± 0.05                                 |

Because our recordings are at an intermediate concentration (EC<sub>50</sub>), some closed dwells may reflect agonist dissociation, others may reflect channel closure followed by re-opening without agonist dissociation, while still others may reflect sojourns in desensitized states of varying duration. As a result, a definition of τ<sub>crit</sub> can be distorted by the relatively low number of long non-conducting sojourns. Thus, we also compared calculated P<sub>open</sub> values for a wide range of possible τ<sub>crit</sub> values (3 orders of magnitude), including those calculated from the closed dwell time histogram. Supplementary Fig. 3 shows that, regardless of how we define τ<sub>crit</sub> (5 ms ≤ τ<sub>crit</sub> ≤ 5000 ms), no systematic difference in P<sub>open</sub> is observed between wild type and F<sub>3</sub>-TrpB with nicotine as agonist—their gating behaviors are essentially indistinguishable. Thus, the value chosen for τ<sub>crit</sub> does not affect our conclusion that the gating behavior, as measured by P<sub>open</sub>, is not significantly impacted upon fluorination in the F<sub>3</sub>-TrpB mutant.

*A small shift in the channel open duration does not account for the EC<sub>50</sub> shift of F<sub>3</sub>-TrpB*

Fits to open dwell time histograms reveal that the main component of the channel open duration, which accounted for >90% of the conductance in both wild type and F<sub>3</sub>-TrpB receptors, is shifted 2.4-fold, from 23 ms (wild type) to 9.6 ms (F<sub>3</sub>-TrpB). Because the closed dwell time histograms, fitted with multiple components, displayed similar contributions from the major components for wild type and F<sub>3</sub>-TrpB, interpreting the 2.4-fold shift in open duration in terms of the channel closing rate, α, would imply a modest 2.4-fold shift in Θ in the F<sub>3</sub>-TrpB receptor. We consider these results in terms of a standard, linear 4-state model with two sequential agonist binding steps followed by a gating step:

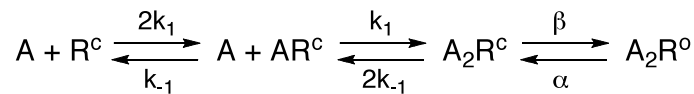

for which,

$$EC_{50} = \frac{K_D}{\sqrt{\Theta + 2} - 1}$$



where  $K_D$  is the equilibrium agonist dissociation constant ( $k_{-1}/k_1$ ) and  $\Theta$  is the gating equilibrium constant ( $\beta/\alpha$ ). We see that a 2.4-fold change in  $\Theta$  accounts for at most a 1.5-fold shift in  $EC_{50}$ . Thus, both comparison of  $P_{open}$  as well as consideration of kinetics, to the extent possible for data at  $EC_{50}$ , indicate that the overwhelming majority of the 15-fold increase in nicotine's  $EC_{50}$  in the F<sub>3</sub>-TrpB receptor versus wild type is caused by changes to binding rather than the subsequent conformational changes that open the channel. Taken together, macroscopic and single-channel experiments show that fluorination modulates nicotine binding in a way that is systematically correlated to the energy of a cation- $\pi$  interaction.

## Supplementary Notes

- <sup>32</sup> Sakmann, B., Patlak, J., and Neher, E., Single acetylcholine-activated channels show burst-kinetics in presence of desensitizing concentrations of agonist. *Nature* **286** (5768), 71 (1980).
- <sup>33</sup> Jackson, M. B. et al., Successive openings of the same acetylcholine receptor channel are correlated in open time. *Biophysical journal* **42** (1), 109 (1983).
